# Supplementary material for: Extracellular loop 2 of G protein–coupled olfactory receptors is critical for odorant recognition
Source: PubMed Central journal article supplement (PMC9442423; doi:10.1016/j.jbc.2022.102331), 2022-08-01
Supplement: mmc1.pdf [file mmc1.pdf]

# Extracellular loop 2 of G protein-coupled olfactory receptors is critical for odorant recognition

*Yiqun Yu<sup>1,2,‡,\*</sup>, Zhenjie Ma<sup>3‡</sup>, Jody Pacalon<sup>4‡</sup>, Lun Xu<sup>1</sup>, Weihao Li<sup>1</sup>, Christine Belloir<sup>5</sup>, Jeremie Topin<sup>4</sup>, Loïc Briand<sup>5</sup>, Jérôme Golebiowski<sup>6,\*</sup>, Xiaojing Cong<sup>7,\*</sup>*

<sup>1</sup> Ear, Nose & Throat Institute, Department of Otolaryngology, Eye, Ear, Nose & Throat Hospital, Fudan University, Shanghai 200031, People's Republic of China

<sup>2</sup> Clinical and Research Center for Olfactory Disorders, Eye, Ear, Nose & Throat Hospital, Fudan University, Shanghai 200031, People's Republic of China

<sup>3</sup> School of Life Sciences, Shanghai University, Shanghai 200444, People's Republic of China

<sup>4</sup> Université Côte d'Azur, CNRS, Institut de Chimie de Nice UMR7272, 06108 Nice Cedex 2, France

<sup>5</sup> Centre des Sciences du Goût et de l'Alimentation (CSGA), Université de Bourgogne-Franche Comté, CNRS, INRA, 21000 Dijon, France

<sup>6</sup> Department of Brain and Cognitive Sciences, Daegu Gyeongbuk Institute of Science and Technology, Daegu 711-873, South Korea

<sup>7</sup> Institut de Génomique Fonctionnelle, Université de Montpellier, CNRS, INSERM, 34094 Montpellier Cedex 5, France.

‡These authors contributed equally.

\* Correspondence should be addressed to [yu\\_yiqun@fudan.edu.cn](mailto:yu_yiqun@fudan.edu.cn), [jerome.golebiowski@gmail.com](mailto:jerome.golebiowski@gmail.com) or [xiaojing.cong@igf.cnrs.fr](mailto:xiaojing.cong@igf.cnrs.fr).

**Table S1.** Structure, hydrophobicity and potency of mOR256-3-wt ligands.

| Odorant             | Structure                                                                         | LogP <sup>a</sup> | Odorant       | Structure                                                                           | LogP <sup>a</sup> |
|---------------------|-----------------------------------------------------------------------------------|-------------------|---------------|-------------------------------------------------------------------------------------|-------------------|
| R-carvone           | 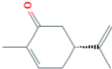 | 2.7               | 1-octanol     |  | 3.0               |
| Coumarin            |  | 2.4               | Octanal       |  | 3.5               |
| Allyl phenylacetate |  | ~2.4 <sup>b</sup> | Octanoic acid |  | 3.1               |
| Benzyl acetate      |  | 2.0               | Citral        |  | 3.5               |
| 2-heptanone         |  | 2.0               | Geraniol      |  | 3.6               |

<sup>a</sup> data from PubChem

<sup>b</sup> computed by XLogP3

**Table S2.** Decoy<sup>a</sup> compounds used for docking benchmark.

| Odorant                  | PubChem CID | Odorant          | PubChem CID |
|--------------------------|-------------|------------------|-------------|
| R-(+)-Pulegone           | 442495      | Diethyl sebacate | 8049        |
| 1-Butanol                | 263         | d-limonene       | 440917      |
| 2,3-Hexanedione          | 19707       | Ethanol          | 702         |
| 2,5-Dimethylpyrazine     | 31252       | Ethyl acetate    | 8857        |
| 2,5-Dimethylpyrrole      | 12265       | Eugenol          | 3314        |
| Ambrette                 | 6753        | Furfural         | 7362        |
| 2-Methoxy-4-methylphenol | 7144        | Hexyl octanoate  | 14228       |
| 2-Octanone               | 8093        | Isobutylamine    | 6558        |
| 3-Methyl-2-butanol       | 11732       | Isobutyraldehyde | 6561        |
| Acetaldehyde             | 177         | Isobutyric acid  | 6590        |
| Acetophenone             | 7410        | Lilial           | 228987      |
| Allyl hexanoate          | 31266       | linalyl          | 91604       |
| Ammonium hydroxide       | 14923       | m-Cresol         | 342         |
| Amyl butyrate            | 10890       | Musk ketone      | 6669        |
| Amyl laurate             | 62571       | Propyl acetate   | 7997        |
| $\alpha$ -Phellandrene   | 7460        | Pyridine         | 1049        |
| Benzyl alcohol           | 244         | Pyrrolidine      | 31268       |
| Benzyl salicylate        | 8363        | Thymol           | 6989        |
| Phenethylamine           | 1001        | Toluene          | 1140        |
| Cyclohexylamine          | 7965        | Cinnamaldehyde   | 637511      |
| Diacetyl                 | 650         | Triethylamine    | 8471        |

<sup>a</sup> Non-effective compounds from the single-dose screening in ref. (29), except for 5 compounds which showed activities in dose-dependent assays in ref. (64) and this work.

**Table S3.** Ten candidate compounds selected from virtual screening for functional assays. The compounds were selected using the procedure shown in Fig. S9.

| Name              | PubChem CID | Structure                                                                           | SMILES                                                |
|-------------------|-------------|-------------------------------------------------------------------------------------|-------------------------------------------------------|
| Cyclohexanone     | 7967        | 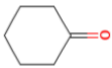   | <chem>C1CCC(=O)CC1</chem>                             |
| (-)-β-Citronellol | 7793        |    | <chem>C[C@@H](CCC=C(C)C)CCO</chem>                    |
| 2-Coumaranone     | 68382       |    | <chem>C1C2=CC=CC=C2OC1=O</chem>                       |
| Ethyl vanillin    | 8467        |    | <chem>CCOC1=C(C=CC(=C1)C=O)O</chem>                   |
| 2,4-DNT           | 8461        |   | <chem>CC1=C(C=C(C=C1)[N+](=O)[O-])[N+](=O)[O-]</chem> |
| 2-Ethyl fenchol   | 106997      |  | <chem>CCC1(C(C2CCC1(C2)C)(C)C)O</chem>                |
| Acetophenone-D3   | 140244      |  | <chem>[2H]C([2H])([2H])C(=O)C1=CC=CC=C1</chem>        |
| 4-chromanone      | 68110       |  | <chem>C1COC2=CC=CC=C2C1=O</chem>                      |
| 2-Nitrotoluene    | 6944        |  | <chem>CC1=CC=CC=C1[N+](=O)[O-]</chem>                 |
| Benzaldehyde      | 240         |  | <chem>C1=CC=C(C=C1)C=O</chem>                         |

**Table S4.** Compounds used in virtual screening in additional to those in Table S3.

| Name                      | Pubchem CID | Name                                 | Pubchem CID |
|---------------------------|-------------|--------------------------------------|-------------|
| Nonanoic acid             | 8158        | Isopropyl Mercaptan                  | 6364        |
| Decanoic acid             | 2969        | Undecanoic acid                      | 8180        |
| Heptanoic acid            | 8094        | Pyrene                               | 31423       |
| Benzophenone              | 3102        | Fluoranthene                         | 9154        |
| Ethyl isobutyrate         | 7342        | Phenethyl acetate                    | 7654        |
| 2-Methyl-1-propanethiol   | 10558       | Undecanedioic acid                   | 15816       |
| Butyl formate             | 11614       | $\beta$ -ionone                      | 638014      |
| Alpha-terpinyl acetate    | 111037      | Sebacid                              | 5192        |
| Butyl butyryl lactate     | 24114       | 1-Methylcyclopropene                 | 151080      |
| Methyl salicylate         | 4133        | $\beta$ -nadph tetrasodium salt      | 5884        |
| Shoyu pyrazine            | 27458       | 1-Heptanethiol                       | 15422       |
| Isoamyl octanoate         | 16255       | Oxoazelaic acid                      | 269945      |
| Dimethyl sulfide          | 1068        | 1-(methylthio)-octane                | 77289       |
| Dextro-sorbitol           | 61431       | Decane-1-10-dithiol                  | 14494       |
| 2-Butanone                | 6569        | 2-methylbutane-1-thiol               | 15877       |
| 4-Methylvaleric acid      | 12587       | Nonane-19-dithiol                    | 248488      |
| Ethylene brassylate       | 61014       | Pentane-15-dithiol                   | 70236       |
| Guaiacol                  | 460         | 3-Methyl-2-butanethiol               | 519823      |
| Isovaleric acid           | 10430       | 1-Propanol                           | 1031        |
| Methanethiol              | 878         | Isopropanol                          | 3776        |
| Pyrazine                  | 9261        | 2-Methyl-2-propanol                  | 6386        |
| Terpineol                 | 17100       | 2-butanol                            | 6568        |
| 1-Hexanethiol             | 8106        | (R)-(+)-1-Phenylethanol              | 637516      |
| MTMT                      | 122370      | Phenetole                            | 7674        |
| NN-Dimethylethylamine     | 11723       | Pyrrole                              | 8027        |
| 2-Mercaptopyrimidine      | 1550489     | Piperidine                           | 8082        |
| thioacetic acid           | 10484       | $\beta$ -Damascone                   | 5374527     |
| Trans-cyclo octene        | 5463599     | Isopropyl tiglate                    | 5367745     |
| 1-(methylthio)ethanethiol | 525462      | TNT                                  | 8376        |
| (methylsulfanyl)methane   | 93236       | 26-bis(trimethylsilyl)benzenethiol   | 15376349    |
| Cis-cyclooctene           | 638079      | 2-(Naphthyl)ethylamine hydrochloride | 16218122    |
| Hexanoic-66-D3 acid       | 12222599    | N-methyl-2-phenylethylamine          | 11503       |
| Methyl DL-lactate         | 11040       | Sodium hydrosulfide                  | 28015       |
| Testosterone              | 6013        | Curcumin                             | 969516      |
| 2-Methyl-2-pentanethiol   | 74213       | Trimethylamine                       | 16387       |

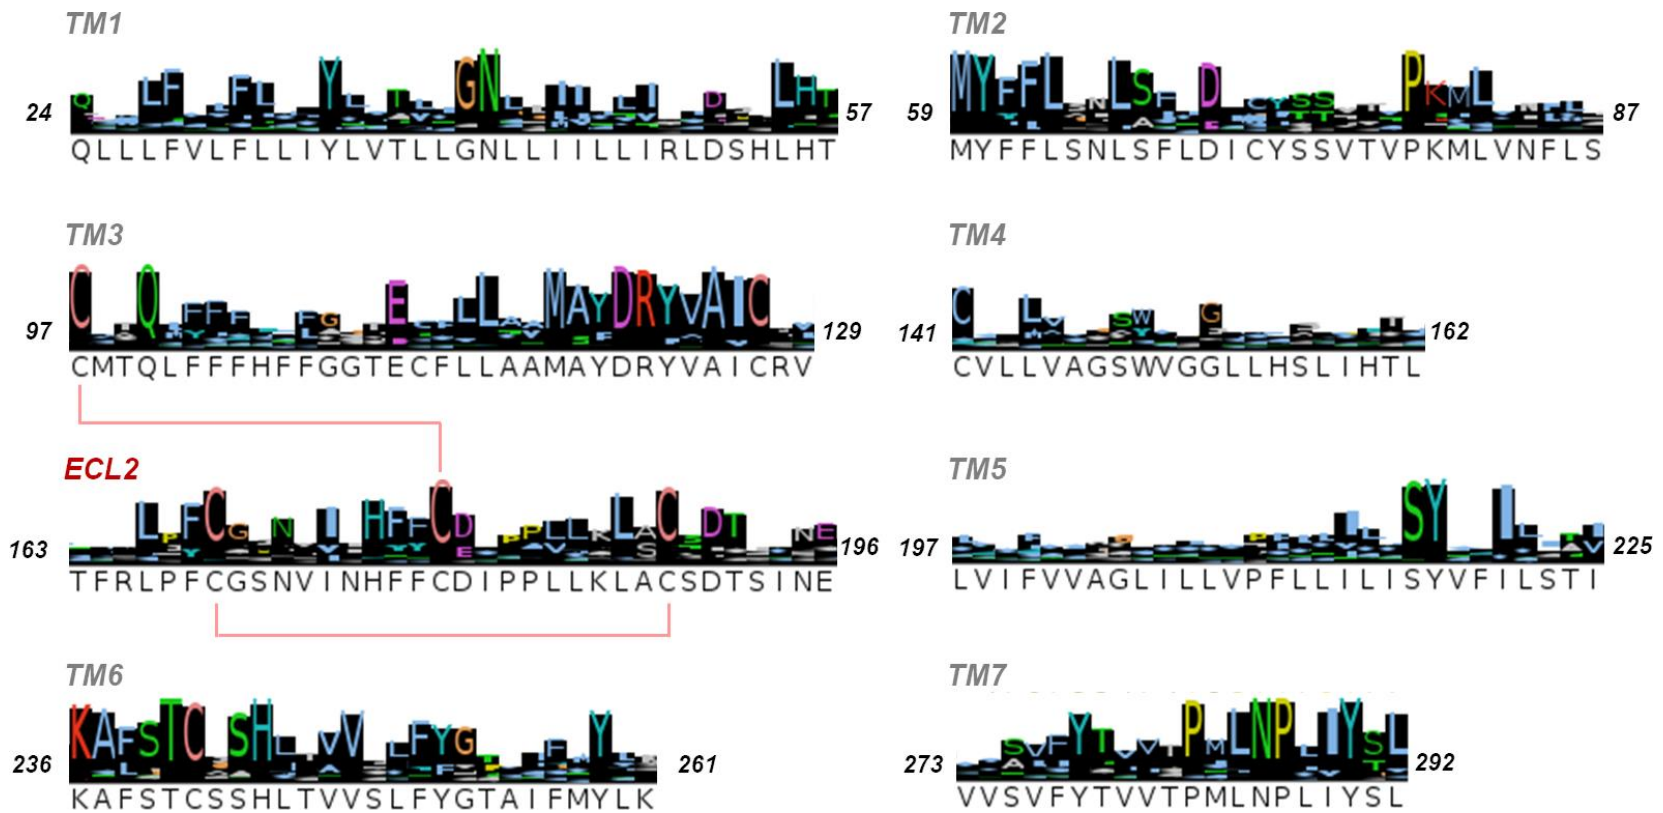

**Figure S1.** Consensus sequence of the TM regions and ECL2 in human and mouse ORs. Residue numbers in mOR256-3 are labeled on both sides of each region. Histogram indicates sequence conservation.

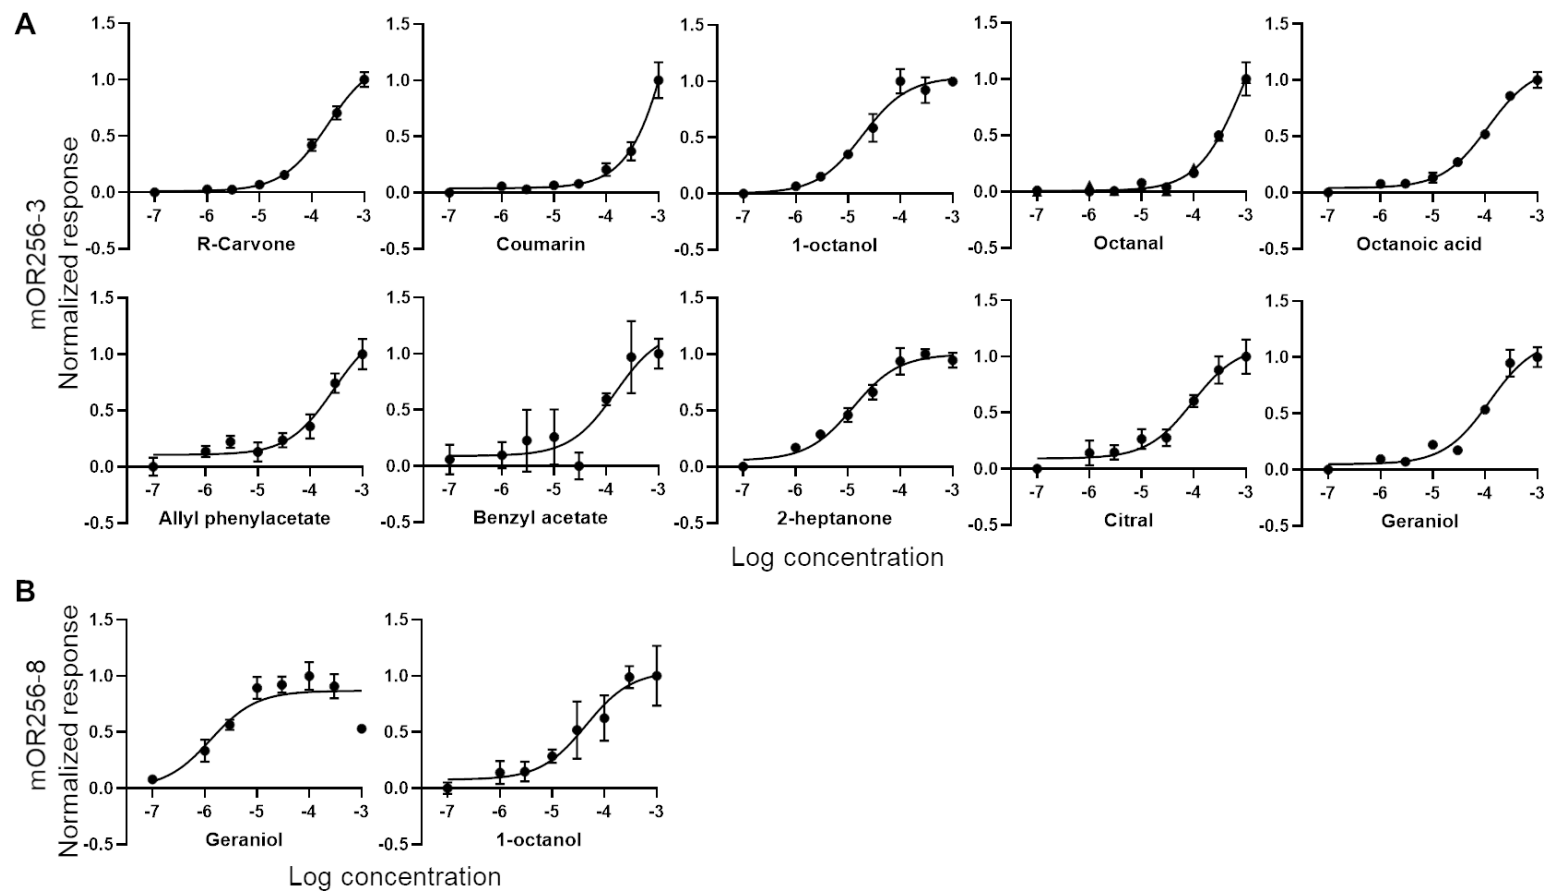

**Figure S2.** Dose-dependent response curves of (A) mOR256-3 and (B) mOR256-8 to their ligands. Data are mean  $\pm$  SEM of 3 technical repeats.

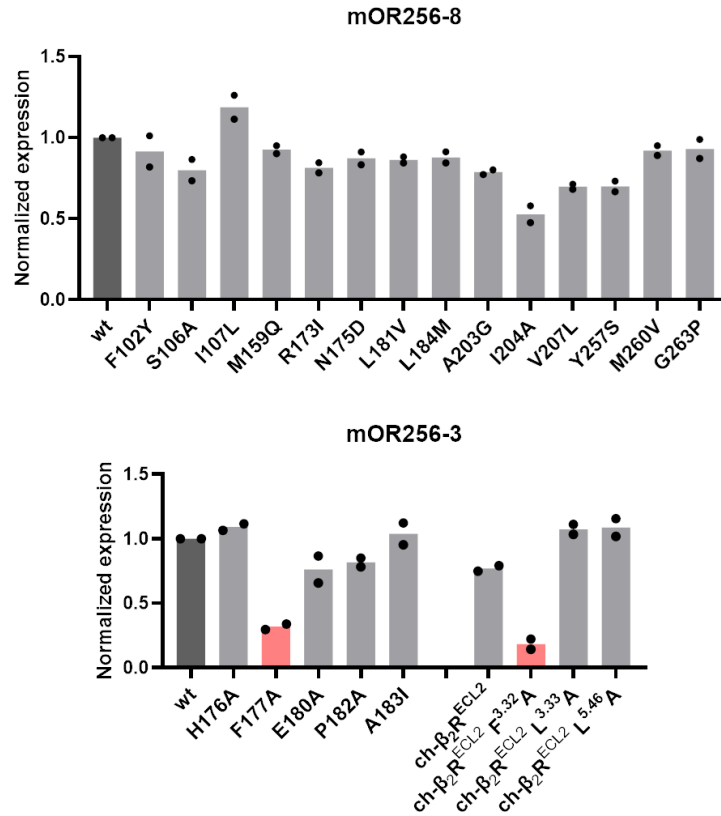

**Figure S3.** Cell-surface expression level of mOR256-3 and mOR256-8 variants relative to the wt receptor. Two technical repeats were performed.

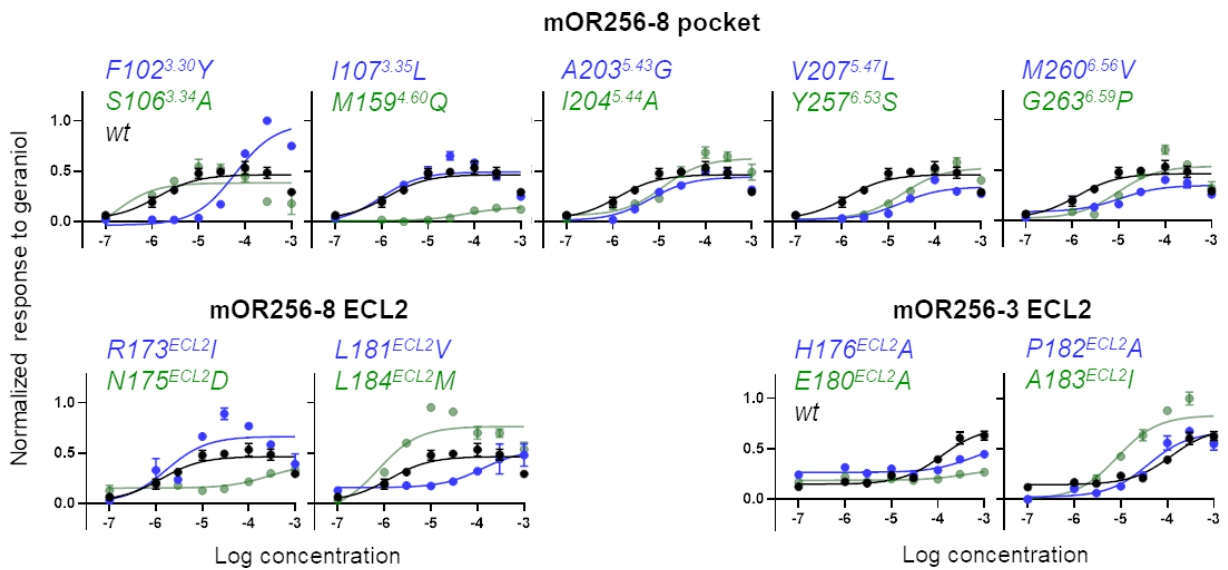

**Figure S4.** Dose-dependent response curves of mOR256-3 and mOR256-8 variants to geraniol. Data are mean  $\pm$  SEM of 3 technical repeats.



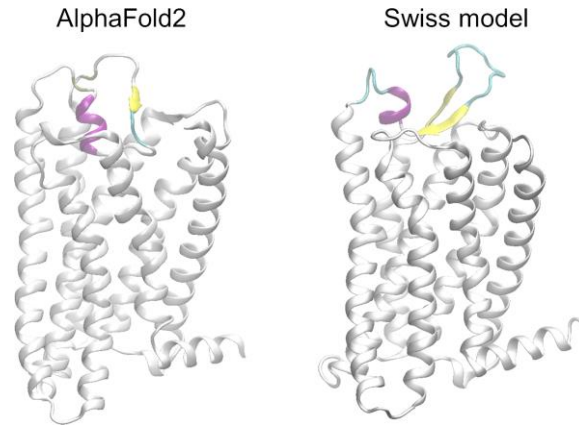

**Figure S5.** mOR256-3 models built by AlphaFold2 and Swiss model. ECL2 is colored by secondary structures. The N- and C-termini are neglected.

```

                                1.50                                2.50
bRho      YYLAEPWQFSMLAAYMFLIMLGFPINFITLYVTVQHK-KLRTPLNYILLNLAVADLFMVFGGFTTTLYTSLHGYFV---FG
CXCR1     TETLNKYVVIAYALVFLLSLLGNLSLMLVILYSR----VGRSVTDVYLLNLALADLLF-ALTLPIWAASKVN-GWI----FG
A2a       MPIMGSSVYITVELAIAVLAIIIGNVLVCWAVWLNS---NQNVNTNYFVVSAAAADIIVGVLAIPFAIAISTG--FC----AA
CXCR4     NANFNKIFLPTIYSIIFLTGIVGNGLVILVMGYQK---KLRSMTDKYRLHLSVADLLF-VITLPPFWAVDAVA-NWY----FG
mOR256-3  DRPWLETPLFVIFLVAYIFALFGNISIIILVSR LDP---QLDSPMYFFVSNLSLLDLCYTTSTVPPQMLVNLGRPEKT----IS
mOR256-8  DRPRLEMVLFIVNFTLYSVAVLGNITIIILVCI LDP---RLHTPMYFFLANLSFLDLCFSTSCIIPQMLVNLWGPDKT----IS

                                3.50                                4.50
bRho      PTCNLEGGFFATLGGEIALWSLVVLAIERVVVVCKPMSNFR-FGENHAIMGVAFTVVMALACAAPPLVGWSR----YIPEG--
CXCR1     TFLCKVVSLLKEVNFYSGILLACISVDRYLAIVHATRTL-TQKRHLVKFVCLGCVGLSMNLSLPPFLFRQA----YHPNN--
A2a       CHGCLFIACFVLVLTASSIFSLAIAIDRYIAIRIPLRYNGLVTGTRAKGIIAICWVLSFAIGLTPMLGWNN----CGQPKE-
CXCR4     NFLCKAVHVIYTVNLYSSVWIIAFISLDRYLAIVHATNSQRPRKLLAEKVYVGVWIPALLLTIPDFIFANV----SEADD--
mOR256-3  YGGCVAQLYIFLALGSTECILLAIMAFDRFAICRPLHYPIIMNQKRCIHMATGTWISGFANSLVQSTL-TTVAPRCGQR---
mOR256-8  YAGCVVQLFSFLSISGSVECIILAVMAYDRYAAVCKPLHYMVIIMHPQLCVRLMAVAVGVGLANAIIMSPL-AMTLPRCGRR---

                                5.50
bRho      ---MQCSGIDIDYTPHE-----ETNNE SFVIYMFVVHFIIIPLIVIFFCYGQLVFTVKEAAAQ-----QESATTQKAEKEV
CXCR1     ---SSPVCYEVLGNDT-----AKWRMVLRLIPHTFGFIVPLFVMLFCYGGFTLRTLRFKAH-----MGQKHRA
A2a       GKAHSGGEGEQVACLFD--EDVVPMNYMVYFNFFACVLP LLLMLGVYLRIFLAARRQLQMESQPLPGERARSTLQKEVHA
CXCR4     ---RYICDRFYPND-----LWVVVFQFQHMVGLILPGIVILSCYCI IISKLSHS-----KGHQKRKA
mOR256-3  -VIDHFFCEVPALLKLA--CTDTSVNEAELNVLGALLLVPLSLILGTYYVFIQAQAVLKLKLSA-----ESRRKA
mOR256-8  -RINHFLCELPALIKMA--CVDARPVEMLSFTLAILIVLLPLTLILVSYGYIAAAVLRIKSA-----AGRWKA

                                6.50                                7.50
bRho      TRMVIIMVIAFLICWLPYAGVAFYIFTHQGSDF-----GPIFMTIPAFFAKTSAVYNPVIYIMMNKQFRNCMVTTLCC-
CXCR1     MRVIFAVVLI FLLCWLPPYNLVLADTLMRQTQVIQESCERRNNIGRALDATEILGFLHSCLNPIIYAFIGQNFRHGFLKILAMH
A2a       AKSLAIIVGLFALCWLPLHII NCTFFFCPDCSHA-----PLWLMYLAIVLSHTNSVNVNFFIYAYRIREFRQTFRKII RSH
CXCR4     LKTTVILILAFFACWLPYYIGISIDSFILLEIIKQGC EFENTVHKWISITEALAFFHCCLNPIYAFILGAKFKTSAQHALTSG
mOR256-3  FNTCASHLLVVSIFYFTAISMYVQPPSSYS-----HERGKIMALFYGIVTPTLNPFITYTLRNKDVKAALRRALRATKE
mOR256-8  FNTCSSHLTVVSLFYGSI IYMYMQPGNSSS-----QDQGF LTLFYNLVTPMLNPLIYTLRNKEMKGALKKVCGRH

```

**Figure S6.** Sequence alignment for the homology modeling of mOR356-3 and mOR256-8.

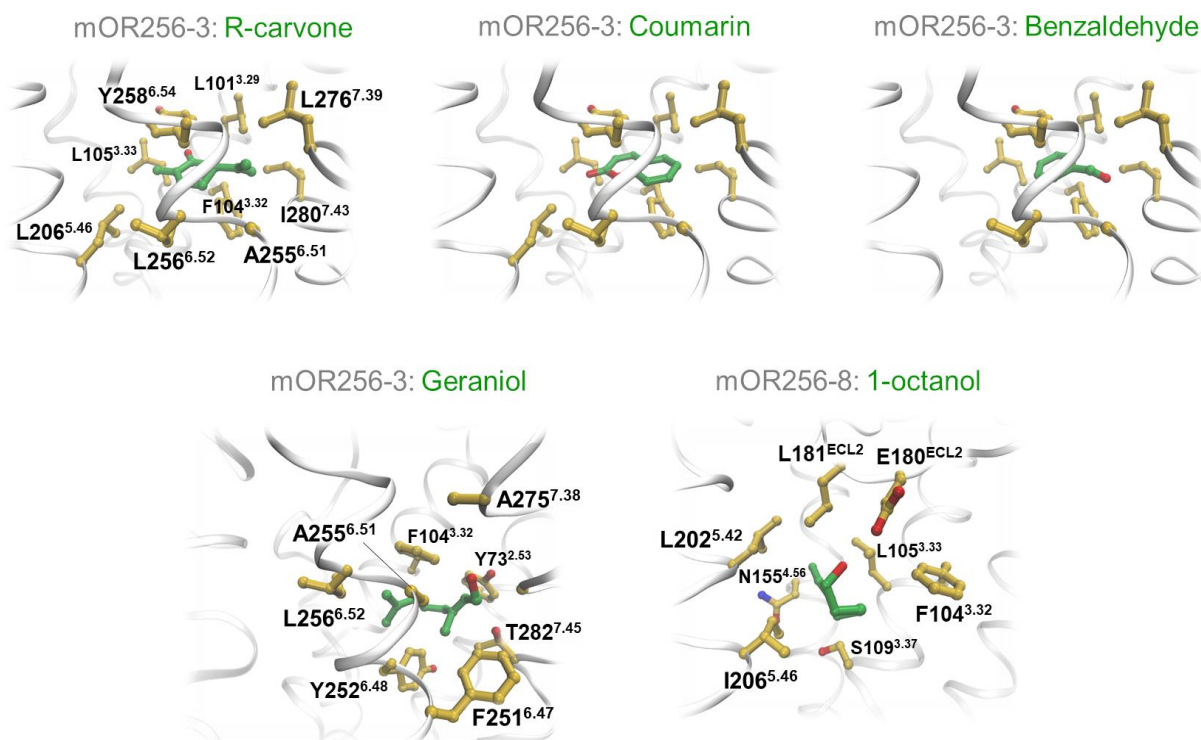

**Figure S7.** Predicted ligand interactions with mOR256-3 and mOR256-8.

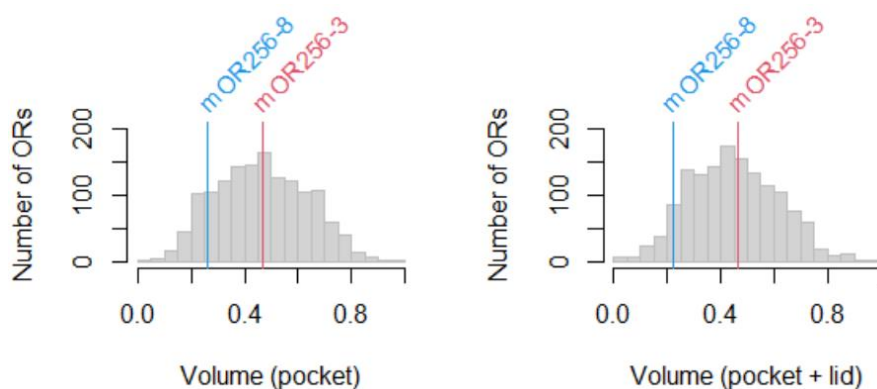

**Figure S8.** Histogram of normalized pocket volume of human and mouse ORs. The pocket volume was calculated from the sum of the side-chain volume of the residues forming the pocket and the lid. We used the 17 pocket residues identified in our previous work (34), in addition to the lid residues chosen according to the homology model in this work. The same residues were used for all the ORs according to the sequence alignment. It is a coarse estimation assuming similar shape and side-chain orientations in the pocket, without considering the 3D stacking of the residues.

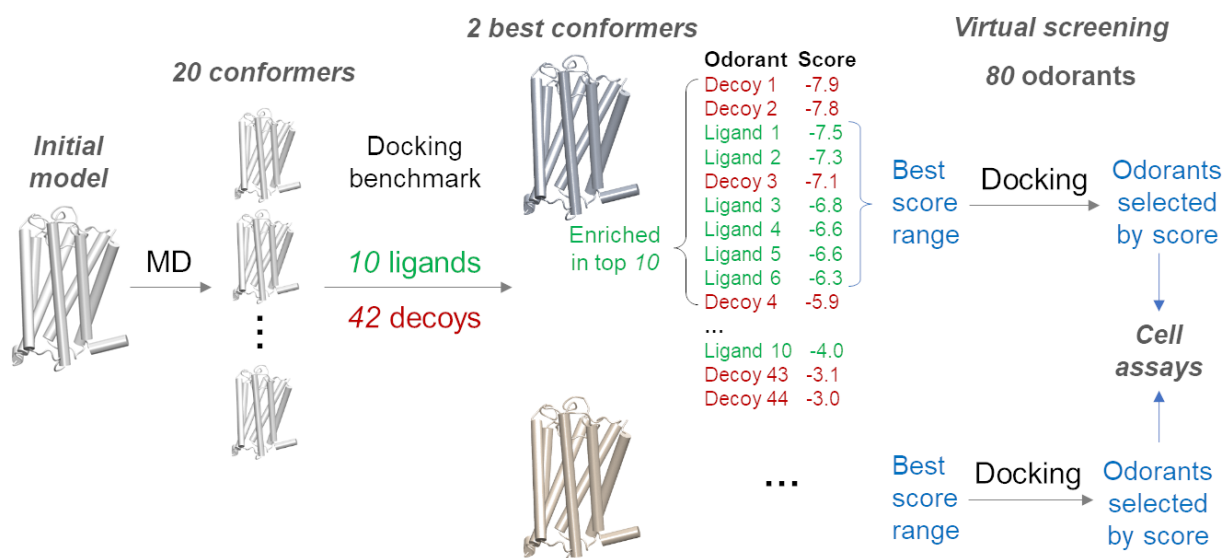

**Figure S9.** Virtual screening protocol. MD simulations were first performed on the initial model to obtain 20 conformers. Benchmark compounds were docked to each of the conformers and ranked by docking scores for the given conformer. The best conformers were chosen as those that returned the most ligands in the 10 top-ranked compounds. The range of scores that best separated the ligands from the decoys was used in the subsequent virtual screening to select hits. We used 2 best conformers for virtual screening and the common hits were tested in cell assays.

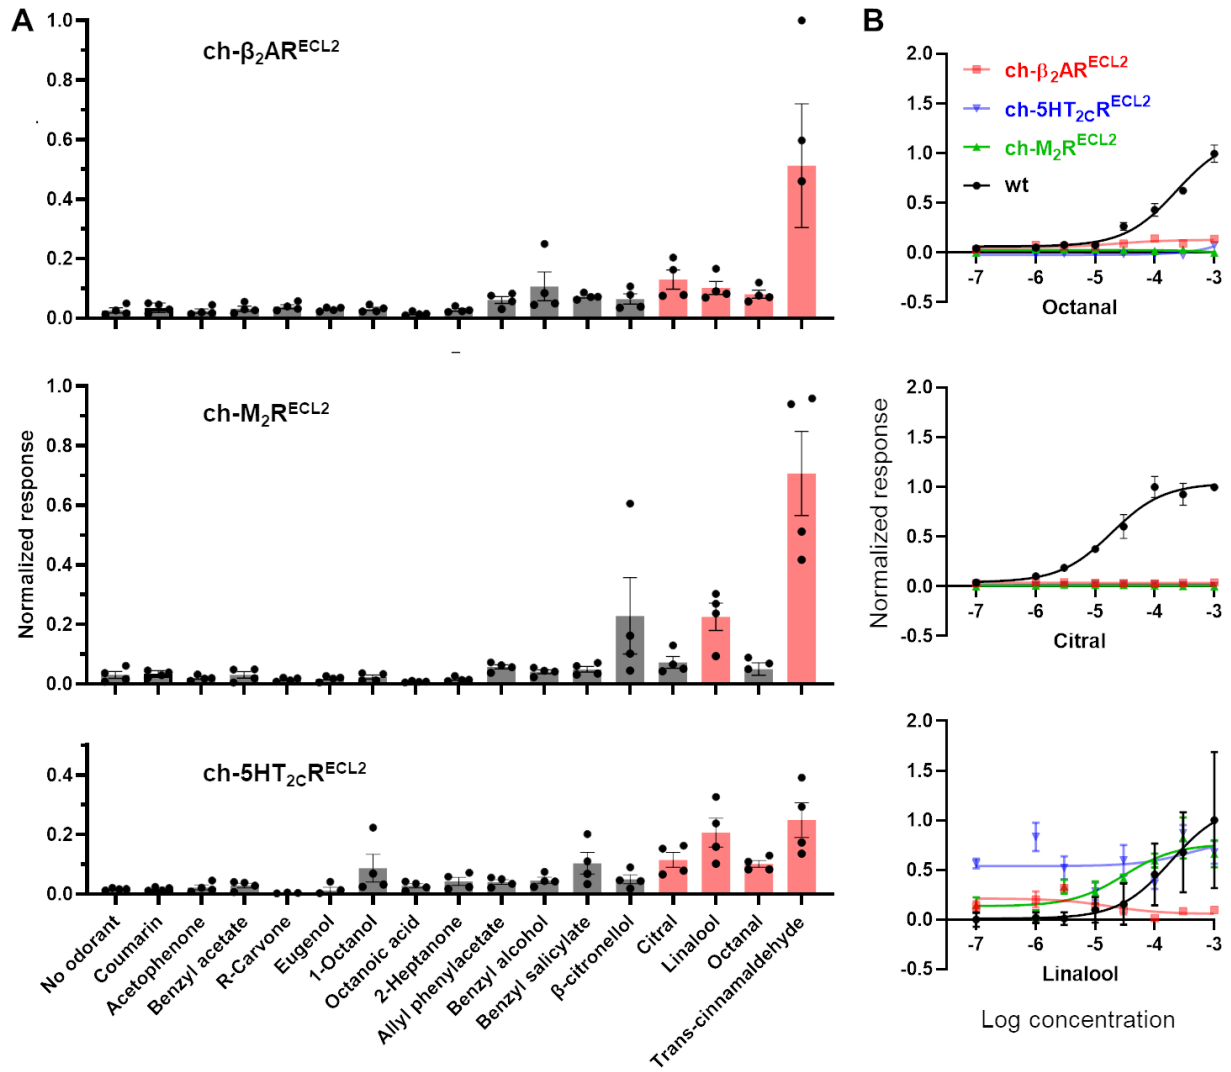

**Figure S10.** Functional assays of mOR256-3 chimeras. **(A)** Screening of 16 odorants at 300  $\mu$ M concentration. Significant responses are colored in red, which were tested in dose-dependent assays in **(B)**. Data are mean  $\pm$  SEM of 3-4 technical repeats.
